# Supplementary material for: Cortactin Contributes to Activity-Dependent Modulation of Spine Actin Dynamics and Spatial Memory Formation
Source: MDPI journal article supplement (doi:10.3390/cells10071835), 2021-07-20
Supplement: s1 [file s1]

## Supplementary Information

**Table S1 – Statistical Information.**

| Figure            | Treatment & Statistics                        |                         |                         |             |            |  |
|-------------------|-----------------------------------------------|-------------------------|-------------------------|-------------|------------|--|
| Fig.1A            | Normal distribution?                          | Kolmogorov-Smirnov Test |                         | Passed: No  |            |  |
|                   | Kruskal-Wallis test with post-Hoc Dunn's test |                         |                         |             |            |  |
|                   |                                               | Wildtype                | Cttn KO                 |             |            |  |
|                   | Border                                        | 86.436 ± 1.871 %        | 86.065 ± 2.277 %        |             |            |  |
|                   |                                               | WT middle p<0.05        | KO middle p<0.05        |             |            |  |
|                   |                                               | WT center p<0.001       | KO center p<0.001       |             |            |  |
|                   | Middle                                        | 10.561 ± 1.292 %        | 10.356 ± 1.569 %        |             |            |  |
|                   | Center                                        | 2.980 ± 0.746 %         | 3.577 ± 0.788 %         |             |            |  |
| Fig.1B            | Normal distribution?                          | Kolmogorov-Smirnov Test |                         | Passed: Yes |            |  |
|                   | Two-Way ANOVA                                 | Interaction             | F(4,12,61.2) = 8.66     | p = 0.593   | df = 4.12  |  |
|                   | Repeated Measures                             | Genotype                | F(1,20) = 3.14          | p = 0.092   | df = 1     |  |
|                   |                                               | Training Time           | F(7,104) = 0.796        | p < 0.001   | df = 7     |  |
|                   | Escape Latency                                | Wildtype                | Cttn KO                 |             |            |  |
|                   | Training Day 1                                | 27.658 ± 5.104 s        | 38.681 ± 4.448 s        |             |            |  |
|                   | Training Day 2                                | 20.544 ± 2.830 s        | 26.472 ± 4.464 s        |             |            |  |
|                   | Training Day 3                                | 17.842 ± 2.715 s        | 24.940 ± 6.263 s        |             |            |  |
|                   | Training Day 4                                | 12.058 ± 3.874 s        | 17.545 ± 3.287 s        |             |            |  |
|                   | Training Day 5                                | 15.575 ± 5.625 s        | 28.980 ± 2.719 s        |             |            |  |
|                   | Training Day 6                                | 12.792 ± 4.834 s        | 19.935 ± 3.198 s        |             |            |  |
|                   | Training Day 7                                | 12.350 ± 4.846 s        | 16.590 ± 4.577 s        |             |            |  |
|                   | Training Day 8                                | 7.575 ± 1.816 s         | 13.730 ± 2.761 s        |             |            |  |
|                   | Fig.1C                                        | Normal distribution?    | Kolmogorov-Smirnov Test |             | Passed: No |  |
|                   |                                               | Platform crossings      | Wildtype                | Cttn KO     |            |  |
| Probe Trial Day 3 |                                               | 2.333 ± 0.408           | 1.375 ± 0.324           |             |            |  |
| Probe Trial Day 6 |                                               | 2.667 ± 0.421           | 1.400 ± 0.400           |             |            |  |
| Probe Trial Day 9 |                                               | 3.000 ± 0.632           | 2.400 ± 0.600           |             |            |  |
| Fig.1D            | Normal distribution?                          | Kolmogorov-Smirnov Test |                         | Passed: Yes |            |  |
|                   | Two-Way ANOVA                                 | Interaction             | F(1,64) = 8.047         | p = 0.006   | df=1       |  |
|                   | Sidak's Multiple Comparisons                  | Genotype                | F(1,64) = 1.989         | p = 0.163   | df=1       |  |
|                   |                                               | Quadrants               | F(1,64) = 15.54         | p < 0.001   | df=1       |  |
|                   | Quadrant Preference                           | Wildtype                | Cttn KO                 |             |            |  |
|                   | Target Quadrant                               | 39.333 ± 3.660 %        | 27.365 ± 3.520 %        |             |            |  |
|                   |                                               | WT OQ p<0.01            |                         |             |            |  |
|                   | Other Quadrants                               | 20.520 ± 1.945 %        | 23.122 ± 2.360 %        |             |            |  |

| Figure | Treatment & Statiscs          |                                      |                                   |             |      |
|--------|-------------------------------|--------------------------------------|-----------------------------------|-------------|------|
| Fig.1E | Normal distribution?          | Kolmogorov-Smirnov Test              |                                   | Passed: Yes |      |
|        | Two-Way ANOVA                 | Interaction                          | F(1,40) = 4.650                   | p = 0.037   | df=1 |
|        | Sidak's Multiple Comparisons  | Genotype                             | F(1,40) = 1.176                   | p = 0.285   | df=1 |
|        |                               | Quadrants                            | F(1,40) = 21.97                   | p < 0.001   | df=1 |
|        | <b>Quadrant Preference</b>    | <b>Wildtype</b>                      | <b>Cttn KO</b>                    |             |      |
|        | Target Quadrant               | 43.148 ± 3.891 %<br>WT OQ p<0.001    | 31.690 ± 5.513 %                  |             |      |
|        | Other Quadrants               | 18.951 ± 1.792 %<br>22.741 ± 3.122 % |                                   |             |      |
| Fig.1F | Normal distribution?          | Kolmogorov-Smirnov Test              |                                   | Passed: Yes |      |
|        | Two-Way ANOVA                 | Interaction                          | F(1,40) = 0.918                   | p = 0.344   | df=1 |
|        | Sidak's Multiple Comparisons  | Genotype                             | F(1,40) = 0.225                   | p = 0.638   | df=1 |
|        |                               | Quadrants                            | F(1,40) = 61.77                   | p < 0.001   | df=1 |
|        | <b>Quadrant Preference</b>    | <b>Wildtype</b>                      | <b>Cttn KO</b>                    |             |      |
|        | Target Quadrant               | 49.148 ± 3.869 %<br>WT OQ p<0.001    | 43.910 ± 5.599 %<br>KO OQ p<0.001 |             |      |
|        | Other Quadrants               | 16.913 ± 2.013 %<br>18.681 ± 3.869 % |                                   |             |      |
| Fig.2A | Normal distribution?          | Kolmogorov-Smirnov Test              |                                   | Passed: Yes |      |
|        | <b>Stimulus Intensity</b>     | <b>Wildtype</b>                      | <b>Cttn KO</b>                    |             |      |
|        | 25 µA                         | -0.521 ± 0.062 mV/ms                 | -0.516 ± 0.074 mV/ms              |             |      |
|        | 50 µA                         | -0.977 ± 0.147 mV/ms                 | -0.883 ± 0.125 mV/ms              |             |      |
|        | 75 µA                         | -1.484 ± 0.288 mV/ms                 | -1.146 ± 0.143 mV/ms              |             |      |
|        | 100 µA                        | -1.870 ± 0.362 mV/ms                 | -1.488 ± 0.197 mV/ms              |             |      |
|        | 125 µA                        | -2.201 ± 0.398 mV/ms                 | -1.773 ± 0.241 mV/ms              |             |      |
|        | 150 µA                        | -2.440 ± 0.421 mV/ms                 | -1.998 ± 0.269 mV/ms              |             |      |
|        | 175 µA                        | -2.675 ± 0.442 mV/ms                 | -2.205 ± 0.294 mV/ms              |             |      |
|        | 200 µA                        | -2.804 ± 0.462 mV/ms                 | -2.300 ± 0.296 mV/ms              |             |      |
|        | 225 µA                        | -2.959 ± 0.281 mV/ms                 | -2.410 ± 0.323 mV/ms              |             |      |
|        | 250µA                         | -3.022 ± 0.474 mV/ms                 | -2.480 ± 0.307 mV/ms              |             |      |
| Fig.2B | Normal distribution?          | Kolmogorov-Smirnov Test              |                                   | Passed: Yes |      |
|        | <b>Fiber Volley Amplitude</b> | <b>Wildtype</b>                      | <b>Cttn KO</b>                    |             |      |
|        | 0.1 mV                        | -0.137 ± 0.010 mV/ms                 | -0.129 ± 0.011 mV/ms              |             |      |
|        | 0.2 mV                        | -0.168 ± 0.013 mV/ms                 | -0.163 ± 0.021 mV/ms              |             |      |
|        | 0.3 mV                        | -0.238 ± 0.020 mV/ms                 | -0.219 ± 0.019 mV/ms              |             |      |
|        | 0.4 mV                        | -0.270 ± 0.021 mV/ms                 | -0.215 ± 0.020 mV/ms              |             |      |
|        | 0.5 mV                        | -0.315 ± 0.034 mV/ms                 | -0.254 ± 0.023 mV/ms              |             |      |
|        | 0.6 mV                        | -0.333 ± 0.033 mV/ms                 | -0.268 ± 0.024 mV/ms              |             |      |
|        | 0.7 mV                        | -0.379 ± 0.049 mV/ms                 | -0.313 ± 0.022 mV/ms              |             |      |
|        | 0.8 mV                        | -0.443 ± 0.048 mV/ms                 | -0.358 ± 0.023 mV/ms              |             |      |

| Figure | Treatment & Statistics                        |                                                                        |                              |
|--------|-----------------------------------------------|------------------------------------------------------------------------|------------------------------|
| Fig.2C | Normal distribution?                          | Kolmogorov-Smirnov Test                                                | Passed: Yes                  |
|        | ISI                                           | Wildtype                                                               | Cttn KO                      |
|        | 160 ms                                        | 131.736 ± 6.900 %                                                      | 137.916 ± 4.670 %            |
|        | 80 ms                                         | 171.860 ± 4.306 %                                                      | 166.184 ± 7.126 %            |
|        | 40 ms                                         | 175.633 ± 10.041 %                                                     | 187.450 ± 12.023 %           |
|        | 20 ms                                         | 251.070 ± 33.038 %                                                     | 261.364 ± 28.971 %           |
|        | 10 ms                                         | 286.319 ± 41.884 %                                                     | 275.367 ± 30.732 %           |
| Fig.2D | Normal distribution?                          | Kolmogorov-Smirnov Test                                                | Passed: Yes                  |
|        | Last 5' of LTP                                | Wildtype<br>134.753 ± 0.333 %<br>Cttn KO p < 0.001<br>Student's t-Test | Cttn KO<br>125.037 ± 0.795 % |
| Fig.3B | Normal distribution?                          | Kolmogorov-Smirnov Test                                                | Passed: No                   |
|        | Kruskal-Wallis test with post-Hoc Dunn's test |                                                                        |                              |
|        | Turnover Time                                 | Wildtype                                                               | Cttn KO                      |
|        | DIV14                                         | 59.770 ± 6.422 s                                                       | 51.549 ± 2.880 s             |
|        | DIV21                                         | 40.636 ± 2.943 s                                                       | 36.698 ± 1.990 s             |
|        |                                               |                                                                        | KO DIV14 p<0.01              |
|        | Dynamic Fraction                              | Wildtype                                                               | Cttn KO                      |
|        | DIV14                                         | 0.819 ± 0.028                                                          | 0.827 ± 0.028                |
|        | DIV21                                         | 0.799 ± 0.018                                                          | 0.820 ± 0.019                |
| Fig.3D | Normal distribution?                          | Kolmogorov-Smirnov Test                                                | Passed: Yes                  |
|        | abs. µm change                                | Wildtype                                                               | Cttn KO                      |
|        | DIV14                                         | 0.147 ± 0.010 µm                                                       | 0.172 ± 0.009 µm             |
|        | DIV21                                         | 0.146 ± 0.010 µm                                                       | 0.161 ± 0.011 µm             |
|        | mean µm change                                | Wildtype                                                               | Cttn KO                      |
|        | DIV14                                         | 0.006 ± 0.008 µm                                                       | 0.007 ± 0.005 µm             |
|        | DIV21                                         | -0.003 ± 0.007 µm                                                      | -0.003 ± 0.003 µm            |
| Fig.3E | Normal distribution?                          | Kolmogorov-Smirnov Test                                                | Passed: No                   |
|        | abs. length change                            | Wildtype                                                               | Cttn KO                      |
|        | DIV14                                         | 0.220 ± 0.037 µm                                                       | 0.195 ± 0.015 µm             |
|        | DIV21                                         | 0.166 ± 0.007 µm                                                       | 0.178 ± 0.016 µm             |
|        | mean length change                            | Wildtype                                                               | Cttn KO                      |
|        | DIV14                                         | -0.020 ± 0.011 µm                                                      | -0.012 ± 0.005 µm            |
|        | DIV21                                         | 0.016 ± 0.006 µm                                                       | 0.007 ± 0.005 µm             |

| Figure | Treatment & Statiscs             |                                               |                              |           |             |
|--------|----------------------------------|-----------------------------------------------|------------------------------|-----------|-------------|
| Fig.4A | Normal distribution?             | Kolmogorov-Smirnov Test                       |                              |           | Passed: Yes |
|        | Spine density<br>Spines/ $\mu$ M | Wildtype<br>1.122 $\pm$ 0.049                 | Cttn KO<br>1.195 $\pm$ 0.086 |           |             |
| Fig.4B | Normal distribution?             | Kolmogorov-Smirnov Test                       |                              |           | Passed: Yes |
|        | Two-Way ANOVA                    | Interaction                                   | F(1,56) = 22.54              | p < 0.001 | df=1        |
|        | Sidak's Multiple Comparisons     | Genotype                                      | F(1,56) = 10.66              | p = 0.002 | df=1        |
|        |                                  | Treatment                                     | F(1,56) = 8.225              | p = 0.006 | df=1        |
|        | Spine head diameter              | Wildtype                                      | Cttn KO                      |           |             |
|        | Ctrl                             | 0.553 $\pm$ 0.011 $\mu$ m                     | 0.583 $\pm$ 0.008 $\mu$ m    |           |             |
| Fig.4E | 60' post cLTP                    | 0.685 $\pm$ 0.013 $\mu$ m                     | 0.599 $\pm$ 0.013 $\mu$ m    |           |             |
|        |                                  | WT Ctrl p < 0.001                             |                              |           |             |
|        | Normal distribution?             | Kolmogorov-Smirnov Test                       |                              |           | Passed: No  |
|        |                                  | Kruskal-Wallis test with post-Hoc Dunn's test |                              |           |             |
| Fig.4E | Turnover Time                    | Wildtype                                      | Cttn KO                      |           |             |
|        | Ctrl                             | 51.759 $\pm$ 2.828 s                          | 46.671 $\pm$ 3.069 s         |           |             |
|        | 15' post cLTP                    | 65.612 $\pm$ 5.557 s                          | 75.897 $\pm$ 8.123 s         |           |             |
|        |                                  | KO Ctrl p<0.01                                |                              |           |             |
| Fig.4E | Dynamic Fraction                 | Wildtype                                      | Cttn KO                      |           |             |
|        | Ctrl                             | 0.787 $\pm$ 0.015                             | 0.763 $\pm$ 0.012            |           |             |
|        | 15' post cLTP                    | 0.699 $\pm$ 0.023                             | 0.835 $\pm$ 0.058            |           |             |
|        |                                  | WT Ctrl p<0.05                                |                              |           |             |
